# Supplementary material for: Mimicry can drive convergence in structural and light transmission features of transparent wings in Lepidoptera
Source: eLife. 2021 Dec 21;10:e69080. doi: 10.7554/eLife.69080 (PMC8691843; doi:10.7554/eLife.69080)
Supplement: Supplementary file 1. — (a) Tests of convergence of transparent patches, as perceived by predators, among co-mimetic species: achromatic contrasts. All the visual systems (VS and UVS) and the illuminants (large gap ‘lg’ and forest shade ‘fs’) tested are presented. We tested whether mean achromatic contrast (dL) between co-mimetic species is smaller than expected at random (expected mean dL for co-mimics ± standard deviation (sd)). To do so, we randomised the value of the achromatic contrast 10,000 times over each pair of species and we calculated the p-value as the proportion of randomisations where the mean achromatic contrast for co-mimics is smaller than the observed mean achromatic contrast. We also considered whether co-mimetic species were more similar than expected according to their phylogenetic relationship. To do so, we did a linear model between achromatic contrasts and phylogenetic distances to account for the effect of phylogeny on the achromatic contrast and we considered the mean of residuals for co-mimetic species. If co-mimetic species are more similar than expected according to their phylogenetic relationship, the mean of residuals should be negative. To test whether the mean of residuals is smaller than expected according to the phylogeny, we randomised residuals over all pair of species and we calculated the mean of residuals for co-mimetic species. We calculated ‘p-value with phylogenetic correction’ as the proportion of randomisations where the mean of residuals is smaller than the observed mean of residuals. If the p-value is smaller than 0.05, it means that co-mimetic species are more similar than expected at random and if the p-value with phylogenetic correction is smaller than 0.05, it means that the observed similarity is due to convergence. We also present p-values corrected with multiple testing with the ‘Holm’ method. (b) Tests of convergence of transparent patches, as perceived by predators, among co-mimetic species: chromatic contrasts. All the visual system [file elife-69080-supp1.xlsx]

## Sheet: Supplementary File 1a
			Similarity				Convergence
Illuminant	Measured spot compared between 2 co-mimics	Avian visual model type	Observed mean dL for co-mimics	Expected mean dL for	p-value	p-value corrected for multiple testing	Observed mean residuals for co-mimics	p-value with phylogenetic correction	p-value with phylogenetic correction corrected for multiple testing
				co-mimics ± sd
fs	s1	UVS	6.779	7.412 ± 0.452	0.0801 (.)	0.4806	-0.667	0.0547 (.)	0.4923
fs	s1	VS	6.768	7.406 ± 0.454	0.077 (.)	0.462	-0.6646	0.0561 (.)	0.5049
fs	s2	UVS	7.403	8.233 ± 0.540	0.0559 (.)	0.3354	-0.862	0.0438 (*)	0.3504
fs	s2	VS	7.39	8.211 ± 0.536	0.0611 (.)	0.3666	-0.8593	0.0426 (*)	0.3408
fs	s3	UVS	5.159	6.310 ± 0.399	0.0011 (**)	0.0099 (**)	-1.178	0.0007 (***)	0.0063 (**)
fs	s3	VS	5.146	6.294 ± 0.400	0.0014 (**)	0.0126 (*)	-1.176	0.0001(***)	0.001 (**)
fs	s4	UVS	5.148	6.727 ± 0.479	0.0002 (***)	0.0016 (**)	-1.613	< 0.0001 (***)	< 0.0001 (***)
fs	s4	VS	5.14	6.728 ± 0.491	0.0003 (***)	0.0024 (**)	-1.608	< 0.0001 (***)	< 0.0001 (***)
fs	s5	UVS	6.17	8.404 ± 0.601	0.0001 (***)	0.0008 (***)	-2.265	< 0.0001 (***)	< 0.0001 (***)
fs	s5	VS	6.163	8.396 ± 0.603	0.0001 (***)	0.0008 (***)	-2.259	< 0.0001 (***)	< 0.0001 (***)
lg	s1	UVS	6.778	7.408 ± 0.456	0.0823 (.)	0.4938	-0.6655	0.0543 (.)	0.4887
lg	s1	VS	6.765	7.396 ± 0.448	0.0789 (.)	0.4734	-0.6625	0.0533 (.)	0.4797
lg	s2	UVS	7.401	8.223 ± 0.538	0.0615 (.)	0.369	-0.8591	0.0424 (*)	0.3392
lg	s2	VS	7.384	8.207 ± 0.538	0.0618 (.)	0.3708	-0.8559	0.0449 (*)	0.3592
lg	s3	UVS	5.155	6.300 ± 0.404	0.0014 (**)	0.0126 (*)	-1.1755	0.0008 (***)	0.0072 (**)
lg	s3	VS	5.14	6.293 ± 0.402	0.0015 (**)	0.0135 (*)	-1.174	0.0003(***)	0.003 (**)
lg	s4	UVS	5.147	6.740 ± 0.478	0.0002 (***)	0.0018 (**)	-1.61	< 0.0001 (***)	< 0.0001 (***)
lg	s4	VS	5.137	6.706 ± 0.478	0.0003 (***)	0.0024 (**)	-1.604	< 0.0001 (***)	< 0.0001 (***)
lg	s5	UVS	6.161	8.397 ± 0.595	0.0001 (***)	0.0008 (***)	-2.262	< 0.0001 (***)	< 0.0001 (***)
lg	s5	VS	6.153	8.364 ± 0.592	< 0.0001 (***)	< 0.0001 (***)	-2.255	0.0001 (***)	0.001 (**)

## Sheet: Supplementary File 1b
			Similarity				Convergence
Illuminant	Measured spot compared between 2 co-mimics	Avian visual model type	Observed mean dS for co-mimics	Expected mean dS for	p-value	p-value corrected for multiple testing	Observed mean residuals for co-mimics		p-value with phylogenetic correction	p-value with phylogenetic correction corrected for multiple testing
				co-mimics ± sd
fs	s1	UVS	2.727	2.833 ± 0.160	0.2475	1	-0.1168		0.2268	1
fs	s1	VS	2.52	2.621 ± 0.152	0.2643	1	-0.1084		0.2329	1
fs	s2	UVS	3.008	3.278 ± 0.188	0.071 (.)	0.497	-0.2777		0.0539 (.)	0.4851
fs	s2	VS	2.837	3.083 ± 0.167	0.0911 (.)	0.6377	-0.2555		0.0665 (.)	0.5985
fs	s3	UVS	2.861	3.071 ± 0.173	0.114	0.798	-0.2181		0.0949 (.)	0.949
fs	s3	VS	2.652	2.838 ± 0.167	0.1281	0.8967	-0.1929		0.1114	1
fs	s4	UVS	2.703	2.879 ± 0.169	0.1511	0.9066	-0.187		0.1269	1
fs	s4	VS	2.497	2.672 ± 0.167	0.1525	0.915	-0.1821		0.125	1
fs	s5	UVS	2.643	3.033 ± 0.178	0.0145 (*)	0.116	-0.3996		0.009 (**)	0.09 (.)
fs	s5	VS	2.439	2.805 ± 0.171	0.0127 (*)	0.1016	-0.3736		0.0099 (**)	0.099 (.)
lg	s1	UVS	2.707	2.816 ± 0.160	0.2417	1	-0.1202		0.2304	1
lg	s1	VS	2.52	2.624 ± 0.155	0.2487	1	-0.1112		0.2332	1
lg	s2	UVS	2.998	3.270 ± 0.184	0.071 (.)	0.497	-0.2848		0.0519 (.)	0.4671
lg	s2	VS	2.843	3.093± 0.182	0.0855 (.)	0.5985	-0.2637		0.0636 (.)	0.5724
lg	s3	UVS	2.846	3.057 ± 0.174	0.1168	0.8176	-0.2202		0.097 (.)	0.97
lg	s3	VS	2.654	2.841 ± 0.168	0.1306	0.9142	-0.1938		0.1112	1
lg	s4	UVS	2.679	2.867 ± 0.172	0.1373	0.8238	-0.1964		0.1149	1
lg	s4	VS	2.494	2.675 ± 0.170	0.1416	0.8496	-0.1898		0.1192	1
lg	s5	UVS	2.616	3.015 ± 0.177	0.0101 (*)	0.0808 (.)	-0.4084		0.0076 (**)	0.076 (.)
lg	s5	VS	2.425	2.798 ± 0.174	0.0123 (*)	0.0984 (.)	-0.3816		0.011 (*)	0.11

## Sheet: Supplementary File 1c
Variable	Phylogenetic signal	p-value
Scale length	λ = 0.672	< 0.001	***
	K = 0.419	0.001	***
Scale width	λ = 1.00	< 0.001	***
	K = 1.17	0.001	***
Scale density	λ = 0.574	0.0529	.
	K = 0.238	0.003	**
Membrane thickness	λ = 0.996	<0.001	***
	K = 0.563	0.001	***
Nanostructure density	λ = 0.903	<0.001	***
	K = 0.935	0.001	***
Mean transmittance	λ = 0.973	<0.001	***
	K = 1.06	0.001	***
Nanostructure type	δ = 4.44	< 0.001	***
Scale type	δ = 5.41	< 0.001	***
Scale colour (coloured vs. transparent)	D = -0.0945	p(D = 1) = 0
		p(D = 0) = 0.583

## Sheet: Supplementary File 1d
Family	Subfamily	Tribe	Genus	species	ssp	mimicry ring	Tip label in MCCtree	Specimen ID for transmission	Specimen ID for MEB	Collection location	Year of collection	Transparency status	Measured spots used for link between mean transmittance and structures	Scale form	Scale insertion	Scale colour	Mean scale length (µm), calculated from 3 scales	Scale length measurement standard error (µm), calculated from 3 scales	Mean scale width (µm), calculated from 3 scales	Scale width standard error (µm), calculated from 3 scales	Mean scale density (mm-²), calculated from 3 squares	Scale density standard error (mm-²), calculated from 3 squares	Mean membrane thickness (nm), calculated from 2 to 5 photos	Membrane thickness standard error (nm), calculated from 2 to 5 photos	Nanostructure type	Mean nanostructure density (µm-²) from 2 photos (when available)	Nanostructure density standard error (µm-²) from 2 photos (when available)	Average mean transmittance over 300-700 nm for the chosen spots (%), calculated from on 1 to 3 spots	Standard error for mean transmittance over 300-700 nm for the chosen spots (%), calculated from 1 to 3 spots	Average mean transmittance over 300-700 nm for the 5 measured spots (%)	Standard error for mean transmittance over 300-700 nm for the 5 measured spots (%)
Erebidae	Arctiinae	Arctiini	Dysschema	sp.		confusa	ME15_88_DYSSSP1	ME15-88	ME15-88	Peru, San Martin, Carachamera	2015	transparent	s2	lamellar	erected	coloured	111.537	2.37192	31.5527	3.6503	301.925	3.43237	1225.74	410.382	nipples	0.317499	0.150071	32.986	NA	12.59	11.8074
Erebidae	Arctiinae	Arctiini	Hyalurga	egeon		lerida	ME16_67_HYALEGE	ME16-67	ME16-67	Peru, San Martin, Chazuta	2016	transparent	s2	lamellar	erected	coloured	82.0883	4.56788	21.869	1.44049	650.301	77.4272	690.48	224.877	nipples	0.713484	0.12721	2.5601	NA	14.98	12.0578
Erebidae	Arctiinae	Arctiini	Hyalurga	grandis		agnosia	TR17_17_HYALGRA	TR17-17	TR17-17	Peru, San Martin, Shapaja	2015	transparent	s3	lamellar	erected	coloured	107.421	30.6812	11.9737	2.6299	725.66	63.4448	583.04	133.182	nipples	1.77338	0.0112122	5.79577	NA	7.65	5.81455
Erebidae	Arctiinae	Arctiini	Hypocrita	strigifera		blue	ME16_58_HYPOSTRI	ME16-58	ME16-58	Peru, San Martin, Chazuta	2016	opaque	s2, s3, s5	lamellar	flat	transparent	107.36	1.65502	84.4467	5.29898	152.339	20.2744	1010.8	148.42	nipples	1.22652	0.977074	2.31126	1.07281	2.34	0.887912
Erebidae	Arctiinae	Arctiini	Notophyson	tiresias		confusa	ME16_63_NOTOTIR	ME16-63	ME16-63	Peru, San Martin, Urahuasha	2016	transparent	s2	lamellar	flat	coloured	85.321	6.11965	108.471	4.99622	144.101	21.3628	1864.49	602.64	absent	0.0389747	0.0388458	6.09595	NA	7.23	0.72294
Erebidae	Arctiinae			Arctiinae1		eurimedia	TR17_7_MOTH1	TR17-7	TR17-7	Peru, Loreto, Shucushyacu	2015	opaque	s2, s3	lamellar	flat	coloured	71.4933	3.91823	87.6687	5.08864	276.839	13.5849	3085.06	454.879	absent	0.0704608	NA	0.42516	0.392433	2.91	4.60817
Erebidae	Arctiinae			Arctiinae2		lerida	11_1065_MOTH2	11-1065	11-1065	Peru, San Martin, Tarapoto	2011	transparent	s1, s2	lamellar	erected	coloured	111.132	2.04561	7.62533	0.391583	463.102	20.2645	1487.68	660.497	nipples	0.295846	0.0826385	24.1306	1.5701	20.93	7.64615
Erebidae	Arctiinae			Arctiinae3		blue	ME16_15_METASP1	ME16-15	ME16-15	Peru, San Martin, Chazuta	2016	transparent	s4, s5	piliform	erected	coloured	102.019	12.7334	2.33567	0.190647	153.038	11.1016	1777	135.717	nipples	7.11446	0.164698	38.9745	3.83626	31.36	8.10112
Geometridae	Ennominae			Geo1		agnosia	11_1002_GEO1	11-1002	11-1002	Peru, San Martin, Jepelacio	2011 ?	transparent	s3	lamellar	erected	coloured	65.492	7.1869	17.821	3.24789	563.973	37.3896	711.425	118.334	nipples	1.57613	0.111033	29.1576	NA	26.79	15.2967
Geometridae	Ennominae			Geo2		agnosia	ME16_100_GE02	ME16-100	ME16-100	Peru, San Martin, Rumiyacu	2016	transparent	s1, s2, s3	lamellar	erected	coloured	94.5283	10.8817	15.492	3.333	190.744	23.2035	708.46	145.41	nipples	6.17253	0.389429	18.6052	3.52461	21.92	12.4867
Geometridae	Larentiinae		Hagnagora	mortipax		agnosia	Hagnagora_mortipax	TR17-10	TR17-10	Ecuador, Qda del diablo	2011 ?	opaque	s2, s3	lamellar	erected	transparent	68.049	5.96226	32.8383	1.43028	1039.69	84.3764	392.42	46.275	nipples	4.22906	0.0651793	11.9476	7.67975	16.67	14.3065
Geometridae	Larentiinae ?			Geo9		agnosia	TR17_16_GEO9	TR17-16	TR17-16	NA	2006	transparent	s2, s3, s4	lamellar	erected	transparent	67.186	10.8669	41.3463	5.1271	569.636	85.6659	677.16	56.2574	nipples	12.3332	1.20853	47.3994	6.87756	48.5	6.03065
Geometridae				Geo12		eurimedia	ME16_105_GEO1	ME16-105	ME16-105	Peru, San Martin, Carachamera	2016	opaque	s2, s3	lamellar	erected	coloured	97.78	18.7409	20.803	6.75625	629.948	115.407	626.2	93.045	nipples	0.569281	0.0917338	0.474872	0.0700089	0.37	0.123229
Geometridae				Geo3		agnosia	11_1879_GEO3	11-1879	11-1879	Peru, San Martin, Tarapoto	2011	transparent	s1, s2	lamellar	erected	transparent	77.4087	10.4657	35.184	8.30646	579.884	61.1594	1565.6	215.515	maze	1.3654	0.674375	15.3227	3.4631	14.94	5.61622
Notodontidae				Noto1		agnosia	ME16_92_GEO4	ME16-92	ME16-92	Peru, San Martin, Rumipata	2016	transparent	s2	lamellar	erected	coloured	59.0587	18.4751	13.5197	1.48956	462.077	38.4948	634.6	257.906	nipples	4.15536	0.365259	44.0529	NA	42.53	8.10451
Notodontidae				Noto2		agnosia	TR17_1_GEO11	TR17-1	TR17-1	Peru, San Martin, Tunel	2012	transparent	s2, s3	lamellar	erected	transparent	106.972	22.8389	2.46767	0.0651869	436.129	12.7783	585.24	23.7578	nipples	4.21	0.0417116	29.8551	17.4138	38.53	14.9304
Nymphalidae	Biblidinae	Biblidini	Vila	azeca		lerida	LS11_2414_ERES1	LS11-2414	LS11-2414	Peru, San Martin, Shapaja-Chazuta	2012	transparent	s1, s2	lamellar	flat	transparent	101.809	15.4253	43.4593	10.3867	360.556	45.7075	416.413	87.5338	nipples	1.75784	0.503434	19.7273	22.955	23.77	12.6428
Nymphalidae	Biblidinae	Biblidini	Vila	emilia		lerida	ME16_56_ERESCLI	ME16-56	ME16-61	Peru, San Martin, Chazuta	2016	opaque	s2	lamellar	flat	transparent	99.1323	3.14836	54.1903	1.0645	468.068	20.9233	470.672	176.313	nipples	1.35053	0.0830002	4.82593	NA	8.85	10.6269
Nymphalidae	Danainae	Danaini	Lycorea	ilione		confusa	Lycorea_ilione	LS11-1860	11-1000	Peru, San Martin, Puente Serranoyacu	2011	transparent	s2	lamellar	erected	coloured	123.162	1.92925	16.2853	1.73533	119.299	11.8535	2015.07	190.905	absent	0.0182331	0.0100202	14.3399	NA	14.52	4.37446
Nymphalidae	Danainae	Ithomiini	Callithomia	lenea	zelie	confusa	Callithomia_lenea_zelie	20623	20623	Ecuador, Orellana, Anangu	2005	transparent	s3, s4, s5	piliform	erected	coloured	108.454	18.7199	2.61567	0.243097	235.023	15.4623	732.66	25.1136	sponge	18.4069	2.70188	23.8745	4.1061	28.16	7.16289
Nymphalidae	Danainae	Ithomiini	Godyris	hewitsoni		hewitsoni	Godyris_hewitsoni	21050	21050	Ecuador, Zamora-Chinchipe, Arco Iris	2006	transparent	s2, s3	piliform	erected	coloured	144.581	28.625	4.12833	1.05117	155.531	16.5136	1171.18	157.672	pillars	18.9168	1.48804	50.5844	8.01062	54.18	5.31392
Nymphalidae	Danainae	Ithomiini	Godyris	panthyale	panthyale	panthyale	Godyris_panthyale_panthyale	21189	21207	Ecuador, Zamora-Chinchipe, Arco Iris	2006	transparent	s1	piliform	erected	coloured	176.368	56.3562	6.279	2.25945	98.8837	28.5203	905.757	58.6702	pillars	21.6211	NA	68.4089	NA	65.14	8.62204
Nymphalidae	Danainae	Ithomiini	Heterosais	nephele		agnosia	Heterosais_nephele_nephele	20778	20680	Ecuador, Orellana, Anangu	2005	transparent	s4, s5	piliform	erected	coloured	161.384	30.7785	4.30533	0.308698	133.751	4.07004	854.2	15.3808	pillars	13.6315	1.36366	56.1073	0.239277	50.81	7.35583
Nymphalidae	Danainae	Ithomiini	Hyalenna	paradoxa	praestigiosa	panthyale	Hyalenna_paradoxa_praestigiosa	21541	21641	Ecuador, Zamora-Chinchipe, Arco Iris	2006	transparent	s1	piliform	erected	coloured	224.17	87.1331	5.82767	0.755881	126.521	5.27067	1095.41	78.5296	pillars	14.3766	NA	56.4936	NA	51.14	12.1078
Nymphalidae	Danainae	Ithomiini	Hypomenitis	enigma	pseudortygia	panthyale	Hypomenitis_enigma	21292	21270	Ecuador, Zamora-Chinchipe, Arco Iris	2006	transparent	s1, s2	piliform	erected	coloured	121.772	11.5701	3.34433	0.5015	261.294	14.057	684.276	102.664	pillars	20.6951	0.831382	54.6716	6.86826	53.88	14.9176
Nymphalidae	Danainae	Ithomiini	Hypomenitis	lydia		hewitsoni	Hypomenitis_lydia	21272	21272	Ecuador, Zamora-Chinchipe, Arco Iris	2006	transparent	s1, s2	piliform	erected	coloured	162.358	57.7937	4.74667	1.05756	294.645	32.0076	851.9	100.094	pillars	23.9526	0.893039	38.7624	12.01	48.16	11.7816
Nymphalidae	Danainae	Ithomiini	Hypomenitis	oneidodes		theudelinda	Hypomenitis_oneidodes	21535	21245	Ecuador, Zamora-Chinchipe, Arco Iris	2006	transparent	s3	piliform	erected	coloured	157.07	54.4048	4.05	1.13844	151.342	14.9759	814.476	29.1025	pillars	22.8309	NA	44.3089	NA	50.44	7.97097
Nymphalidae	Danainae	Ithomiini	Hypomenitis	ortygia	ortygia	panthyale	Hypomenitis_ortygia_ortygia	21273	21078	Ecuador, Zamora-Chinchipe, Arco Iris	2006	transparent	s1	piliform	erected	coloured	144.235	30.1053	3.871	0.872893	275.008	16.9929	646.563	129.697	pillars	18.0839	0.585029	54.7061	NA	55.54	9.58092
Nymphalidae	Danainae	Ithomiini	Hypomenitis	theudelinda	zalmunna	theudelinda	Hypomenitis_theudilinda_zalmunna	21469	21642	Ecuador, Zamora-Chinchipe, Arco Iris	2006	transparent	s4, s5	piliform	erected	coloured	125.82	10.8597	4.52367	0.746978	224.18	24.1421	620.9	110.054	pillars	18.7472	0.305021	61.7362	3.14299	54.32	9.47296
Nymphalidae	Danainae	Ithomiini	Ithomia	agnosia	agnosia	agnosia	Ithomia_agnosia_agnosia	CP17-3	CP17-3	Peru, Moyobamba	2016	transparent	s2	piliform	erected	coloured	100.479	18.7269	2.85233	0.667324	544.335	49.1756	440.6	128.348	pillars	19.4332	0.933415	38.5404	NA	46.8	8.66167
Nymphalidae	Danainae	Ithomiini	Ithomia	amarilla		eurimedia	Ithomia_amarilla	20569	20569	Ecuador, Orellana, Anangu	2005	transparent	s1, s2, s3	piliform	erected	coloured	123.604	45.442	3.40467	0.381741	521.594	57.6796	478.9	36.8787	nipples	10.6571	1.40581	45.2549	3.84053	41	7.22846
Nymphalidae	Danainae	Ithomiini	Ithomia	avella	epona	theudelinda	Ithomia_avella	21466	ME10-160	Ecuador, Zamora-Chinchipe, Arco Iris / Napo, Yanayacu	2006	transparent	s1, s2	piliform	erected	coloured	145.251	6.06685	3.64733	0.517502	289.167	48.1733	845.058	235.197	pillars	23.1632	1.21201	39.7879	5.00239	43.53	4.41587
Nymphalidae	Danainae	Ithomiini	Mcclungia	cymo		eurimedia	Mcclungia_cymo	DG16-051	DG16-049	Peru, San Martin, Rumiyacu	2015	transparent	s2, s3	piliform	erected	coloured	132.223	4.81262	3.44467	0.220953	684.645	84.3924	591.12	29.6855	sponge	17.9956	3.12497	36.0944	4.77898	45.37	12.7025
Nymphalidae	Danainae	Ithomiini	Megoleria	orestilla	orestilla	banjana-m	Megoleria_orestilla	21296	21296	Ecuador, Zamora-Chinchipe, Arco Iris	2006	transparent	s1, s2	piliform	erected	coloured	144.257	49.7808	3.973	0.99162	220.342	24.1871	840.8	95.7978	maze	9.65281	3.38382	40.3599	0.288794	42.23	2.72131
Nymphalidae	Danainae	Ithomiini	Methona	curvifascia		confusa	Methona_curvifascia	20731	20731	Ecuador, Orellana, Anangu	2005	transparent	s4, s5	lamellar	erected	coloured	47.075	3.61456	30.3957	2.24101	190.91	15.8881	1684.8	28.5254	absent	0.0410019	0.0422201	20.7798	0.0834525	18.53	3.44488
Nymphalidae	Danainae	Ithomiini	Napeogenes	harbona		banjana-m	Napeogenes_harbona	ME10-315	ME10-315	Ecuador, Napo, Yanayacu	2010	transparent	s1, s2	piliform	erected	coloured	83.078	5.23404	2.92733	0.330341	885.971	152.527	368.96	67.6887	nipples	6.18692	0.0488174	33.3832	3.38832	39.77	8.17351
Nymphalidae	Danainae	Ithomiini	Napeogenes	inachia		eurimedia	Napeogenes_inachia	20558	20628	Ecuador, Orellana, Anangu	2005	transparent	s1, s2, s3	piliform	erected	coloured	96.482	4.32791	3.06267	0.301271	985.592	130.314	512.82	38.2946	nipples	17.3042	1.55794	29.0919	4.97678	28.57	5.68269
Nymphalidae	Danainae	Ithomiini	Napeogenes	larilla		theudelinda	Napeogenes_larilla	21299	21261	Ecuador, Zamora-Chinchipe, Arco Iris	2006	transparent	s1, s2, s3	piliform	erected	coloured	67.6647	2.45258	3.48933	0.423934	439.55	33.7603	521.407	159.779	nipples	17.0747	0.265693	47.5162	3.09928	50.79	4.99685
Nymphalidae	Danainae	Ithomiini	Napeogenes	sylphis	corena	aureliana	Napeogenes_sylphis_corena	20669	20669	Ecuador, Orellana, Anangu	2005	transparent	s1, s2	piliform	erected	coloured	120.838	19.1882	3.08867	0.236039	539.452	58.0772	529.181	41.5933	nipples	12.6054	1.11733	37.5129	7.58551	38.06	4.65904
Nymphalidae	Danainae	Ithomiini	Oleria	athalina	banjana	banjana-m	Oleria_athalina_banjana	21175	21175	Ecuador, Zamora-Chinchipe, Arco Iris	2006	transparent	s2	piliform	erected	coloured	96.1953	4.04454	3.148	0.194903	616.969	51.8815	436.86	87.3623	pillars	15.5149	0.0547906	27.9875	NA	37.68	5.69981
Nymphalidae	Danainae	Ithomiini	Oleria	onega		lerida	Oleria_onega	20633	20633	Ecuador, Orellana, Anangu	2005	transparent	s1, s2, s3	piliform	erected	coloured	117.92	5.50369	3.13033	0.440754	466.423	42.6164	441.28	107.262	sponge	7.59667	1.87233	33.3337	10.5221	34.72	7.84351
Nymphalidae	Danainae	Ithomiini	Oleria	sexmaculata	sexmaculata	lerida	Oleria_sexmaculata_sexmaculata	20469	20469	Ecuador, Orellana, Anangu	2005	transparent	s1, s2, s3	piliform	erected	coloured	101.762	4.32493	3.172	0.638073	662.398	78.7143	274.48	70.3766	sponge	10.6952	2.50581	33.5546	4.26266	36.97	5.57378
Nymphalidae	Danainae	Ithomiini	Ollantaya	olerioides		banjana-m	Oleria_olerioides	21309	21309	Ecuador, Zamora-Chinchipe, Arco Iris	2006	transparent	s1, s2	piliform	erected	coloured	87.3243	12.4031	3.012	0.405508	445.815	27.0128	475.3	63.6488	nipples	13.2223	0.330079	44.9038	6.20027	47.44	5.17649
Nymphalidae	Danainae	Ithomiini	Pseudoscada	florula	aureola	aureliana	Pseudoscada_florula_aureola	20635	20635	Ecuador, Orellana, Anangu	2005	transparent	s2	piliform	erected	coloured	124.447	4.48264	2.84233	0.139658	585.863	65.5219	450.26	24.8595	sponge	13.7268	1.4182	28.4766	NA	46.58	11.0754
Nymphalidae	Danainae	Ithomiini	Pseudoscada	timna	utilla	agnosia	Pseudoscada_timna_utilla	20455	20455	Ecuador, Orellana, Anangu	2005	transparent	s2, s3	piliform	erected	coloured	132.332	38.2193	3.26	0.147956	491.087	40.7838	541.36	14.9061	sponge	15.558	1.34561	44.4548	11.038	53.75	13.3756
Nymphalidae	Danainae	Ithomiini	Pteronymia	oneida	oneida	hewitsoni	Pteronymia_oneida_oneida	21359	21359	Ecuador, Zamora-Chinchipe, Arco Iris	2006	transparent	s1, s2	piliform	erected	coloured	106.159	3.78014	3.47167	0.247825	574.912	101.343	755.2	97.438	sponge	11.995	0.553406	31.3553	8.06097	37.06	9.82943
Nymphalidae	Danainae	Ithomiini	Veladyris	pardalis		theudelinda	Veladyris_pardalis	ME10-17	ME10-17	Ecuador, Napo, Yanayacu	2010	transparent	s2	piliform	erected	coloured	142.668	46.6847	4.17433	0.737871	394.077	47.5685	901.375	54.1635	pillars	22.3395	0.573248	32.3086	NA	35.24	3.85611
Nymphalidae	Nymphalinae	Melitaeini	Eresia	nauplius	plagiata	lerida	Eresia_nauplius_plagiata	ME10-292	ME10-292	Ecuador, Napo, Mariposa	2010	opaque	s2	lamellar	flat	coloured	134.162	5.67725	46.7397	1.27039	431.703	18.3226	393.861	110.273	nipples	1.1334	0.099785	0.086138	NA	2.67	2.78974
Papilionidae	Papilioninae	Troidini	Parides	hahneli		confusa	Parides_iphidamas	CP17-10	CP17-10	Brazil, Rio Arapiuns	1978	transparent	s1, s2	lamellar	erected	coloured	128.393	17.0529	27.784	2.65571	253.014	34.5258	1563.8	405.994	absent	0.0387454	0.0388062	5.17366	0.187321	5.07	1.24059
Pieridae	Dismorphiinae		Dismorphia	theucharila	leucone	lerida	TR17_14_DISMTHEU	TR17-14	TR17-14	Ecuador, Orellana, Anangu		transparent	s1, s2, s3	lamellar	erected	transparent	47.6483	2.51559	35.4747	1.03165	600.31	8.68154	632.58	163.696	nipples	11.4107	0.31862	17.6454	14.1535	23.41	12.7839
Pieridae	Dismorphiinae		Dismorphia	theucharila	orange tip	aureliana	TR17_6_DISMTHEU	TR17-6	TR17-22	Ecuador, Orellana, Anangu	2005	transparent	s1	lamellar	erected	coloured	49.9113	4.82358	27.735	3.21626	447.282	19.9408	529.113	105.114	nipples	11.0579	0.661188	12.1674	NA	16.5	5.98103
Pieridae	Dismorphiinae		Dismorphia	theucharila	yolanda	banjana-m	LS11_2240_DISTH	LS11-2240	ME10-375	Peru, San Martin, La Antena	2012	transparent	s2	lamellar	erected	transparent	49.3363	5.24923	30.4327	2.5661	681.041	16.2257	325.575	85.1718	nipples	8.49615	0.87691	2.78093	NA	10.88	5.64615
Pieridae	Dismorphiinae		Moschoneura	pinthous		eurimedia	TR17_3_MOSCPINT	LS11-2399	TR17-3	Peru, San Martin, Tunel	2012	opaque	s1, s2	lamellar	flat	coloured	66.6737	1.54665	40.9783	3.46717	1040.6	77.0312	337.758	39.5962	nipples	1.96525	0.615026	1.16384	0.288764	1.07	0.897507
Pieridae	Dismorphiinae		Patia	orise		confusa	Patia_orise	LS11-1414	LS11-1414	Peru, San Martin, Rumiyacu	2011	transparent	s2	lamellar	erected	coloured	40.5243	1.22916	21.604	2.00892	789.658	28.4449	957.06	169.744	absent	0.0408043	0.0419406	24.3671	NA	14.02	11.6468
Pieridae	Pierinae	Pierini	Itaballia	pandosia		eurimedia	ME16_62_ITAPAND	ME16-62	TR17-20	Peru, San Martin, Urahuasha	2016	opaque	s3	lamellar	flat	coloured	90.383	9.84376	50.463	0.28928	670.962	60.1078	720.446	402.286	nipples	1.8702	0.255958	8.2739	NA	2.63	3.19938
Pieridae	Pierinae		Perrhybris ?	Pier1		eurimedia	MECN_140_PIER1	MECN-140	TR17-21	Ecuador, Napo		opaque	s3	lamellar	flat	coloured	120.725	2.25312	42.68	4.52446	467.121	34.9137	526.059	85.4241	nipples	1.08133	NA	0.83971	NA	0.28	0.316144
Riodinidae	Riodininae	Eurybiini	Ithomiola	floralis	orange tip	aureliana	11-1116_ITHOFLO	11-1116	11-1116	Peru, San Martin, Tarapoto	2011 ?	transparent	s4, s5	lamellar	erected	transparent	73.9937	2.44498	59.4793	1.89802	169.249	30.4051	670.111	46.4473	nipples	14.2818	0.56026	41.0819	5.7013	44.97	11.0639
Riodinidae	Riodininae	Eurybiini	Ithomiola	floralis	white-band	agnosia	11_1127_ITHOFLO	11-1127	11-1127	Peru, San Martin, La Antena	2011	transparent	s3	lamellar	erected	transparent	78.4533	6.31627	57.5727	1.80403	173.633	16.1516	450.557	102.407	nipples	17.1433	0.874682	35.7166	NA	43.95	12.2637
Riodinidae	Riodininae	Nymphidiini	Stalachtis	euterpe		aureliana	TR17_5_STALEUT	TR17-5	TR17-5	Peru, Loreto, Shucushyacu	2015	opaque	s1, s2	lamellar	flat	transparent	64.0067	2.21268	60.6313	2.2474	279.754	48.1321	439.091	33.0666	nipples	1.84529	0.215199	17.0157	22.7186	8.97	13.5877
Riodinidae	Riodininae			Riodin2		agnosia	TR17_12_GEO7	TR17-12	TR17-12	Peru, San Martin, Tarapoto	2015	transparent	s3	lamellar	erected	transparent	64.3933	4.62659	40.462	2.7322	667.852	103.572	437.04	97.7306	nipples	5.33239	0.362467	28.8482	NA	37.77	6.09407
Riodinidae				Riodin1		banjana-m	MECN_133_BUT1	MECN-133	MECN-133	Ecuador, Napo	2011	opaque	s4, s5	lamellar	erected	transparent	76.5943	1.81546	52.0647	4.16505	291.004	13.1045	615.34	232.89	nipples	3.65435	0.149684	15.5346	5.83696	10.9	5.43727
Riodinidae				Riodin3		agnosia	TR17_11_GEO8	TR17-11	TR17-11	Peru, San Martin, Rumipata	2016	transparent	s3	lamellar	erected	transparent	82.142	1.54861	45.0877	2.18588	697.701	41.505	758.107	153.228	nipples	8.84416	0.251005	18.7589	NA	21.18	14.796

## Sheet: Supplementary File 1e
	Model1	Model2	Model3	Model4	Model5	Model6	Model7	Model8
F-statistic	F5,56 = 26.7	F6,55 = 23.0	F4,57 = 31.5	F6,55 = 22.5	F5,56 = 25.9	F4,57 = 31.0	F5,56 = 25.6	F4,57 = 30.6
(p-value)	(< 0.001***)	(< 0.001***)	(< 0.001***)	(< 0.001***)	(< 0.001***)	(< 0.001***)	(< 0.001***)	(< 0.001***)
AICc	469.94	470.18	470.72	471.13	471.26	471.42	471.62	471.88
R2adj	0.6777	0.6838	0.6664	0.6789	0.6708	0.6626	0.6689	0.6601
λ	λ = 0	λ = 0	λ = 0	λ = 0	λ = 0	λ = 0	λ = 0	λ = 0
(p(λ=0), p(λ=1))	(p(λ=0) = 1,	(p(λ=0) = 1,	(p(λ=0) = 1,	(p(λ=0) = 1,	(p(λ=0) = 1,	(p(λ=0) = 1,	(p(λ=0) = 1,	(p(λ=0) = 1,
	p(λ=1)< 0.001)	p(λ=1)< 0.001)	p(λ=1)< 0.001)	p(λ=1)< 0.001)	p(λ=1)< 0.001)	p(λ=1)< 0.001)	p(λ=1)< 0.001)	p(λ=1)< 0.001)
Variable
Intercept	21.89 (***)	24.20 (***)	26.01 (***)	27.99 (***)	32.91 (***)	39.63 (***)	28.30 (***)	33.25 (***)
Scale type Piliform vs. Lamellar	6.898 (***)	8.414 (***)	6.497 (***)	7.101 (***)	6.787 (***)	8.650 (***)	7.737 (***)	10.13 (***)
Scale type Lamellar Flat scale vs. Lamellar Erected scale	6.670 (**)	6.838(**)	6.707 (**)	6.897 (**)	6.976 (**)	7.903 (***)	6.851 (**)	7.750 (***)
Scale density	-0.006339 (n.s.)	-0.005992 (n.s.)	-0.0175 (**)	-0.01147 (n.s.)	-0.02242 (**)	-0.02612 (***)	-0.01814 (**)	-0.0201 (***)
Nanostructure density	1.078 (**)	0.9557 (*)	0.6342 (*)	0.9098 (*)	0.4813 (n.s.)	NA	0.4936 (n.s.)	NA
Interaction between nanostructure density and scale density	-0.001357 (.)	-0.001493 (.)	NA	-0.001229 (n.s.)	NA	NA	NA	NA
Scale colour Transparent vs. Coloured	NA	2.719 (n.s.)	NA	NA	NA	NA	2.285 (n.s.)	3.431 (.)
Membrane thickness	NA	NA	NA	-0.03611 (n.s.)	-0.004358 (n.s.)	-0.006253 (*)	NA	NA

## Sheet: Supplementary File 1f
Dependent Variable	Fixed effect	Random effect	Total number of observations	Number of groups	R	95% confidence interval	p-value (obtained by LRT)	p-value (obtained by permutation)	Median CV (%)
Mean transmittance over 400-700 nm		Species, Individual, spot	476 obs	11 groups	Rspecies = 0.582	[0.261 ; 0.759]	< 0.001 ***	0.807
				32 groups	Rindividual = 0.0522	[0 ; 0.16]	0.038 *	0.417
				160 groups	Rspot = 0.348	[0.197 ; 0.625]	< 0.001 ***	0.001 ***	2.13
Chroma over 400-700 nm		Species, Individual, spot	476 obs	11 groups	Rspecies = 0.556	[0.272 ; 0.73]	< 0.001 ***	0.769
				32 groups	Rindividual = 0.0282	[0 ; 0.122]	0.177	0.452
				160 groups	Rspot = 0.401	[0.238 ; 0.662]	< 0.001 ***	0.001 ***	3.41
Scale density	Species, sex	Individual, spot	120 obs	30 groups	Rindividual = 0	[0 ; 0.169]	1	1
				60 groups	Rspot = 0.327	[0.155 ; 0.447]	< 0.001 ***	0.001 ***	13.1
Scale length
Bifid piliform scale	Species, sex	Individual, spot	246 obs	30 groups	Rindividual = 0.0779	[0 ; 0.244]	0.196	0.304
				50 group	Rspot = 0.245	[0.0604 ; 0.404]	< 0.001 ***	0.001 ***	7.69
Monofid piliform scale	Species, sex	Individual, spot	354 obs	30 groups	Rindividual = 0	[0 ; 0.0883]	1	1
				60 groups	Rspot = 0.113	[0.00224 ; 0.192]	<0.001 ***	0.001 ***	16.5
Scale width
Bifid piliform scale	Species, sex	Individual, spot	246 obs	30 groups	Rindividual = 0.149	[0 ; 0.315]	0.026	0.161
				50 groups	Rspot = 0.149	[0.0223 ; 0.302]	< 0.001 ***	0.001 ***	8.31
Monofid piliform scale	Species, sex	Individual, spot	354 obs	30 groups	Rindividual = 0	[0 ; 0.0551]	1	1
				60 groups	Rspot = 0.0816	[0.0132 ; 0.136]	< 0.001 ***	0.002 ***	9.33

## Sheet: Supplementary File 1g
Dependent Variable	Random effect	Number of observations	Number of groups	R	95% confidence interval	p-value (obtained by LRT)	p-value (obtained by permutation)	Median CV (%)
Mean transmittance over 400-700 nm	Species, spot$	274 obs.	19 groups	Rspecies = 0.663	[0.435 ; 0.791]	< 0.001 ***	0.215
			95 groups	Rspot = 0.144	[0.0734 ; 0.276]	< 0.001 ***	< 0.001 ***	25.3
Chroma over 400-700 nm	Species, spot$	274 obs	19 groups	Rspecies = 0.657	[0.446 ; 0.784]	< 0.001 ***	0.05*
			95 groups	Rspot = 0.0587	[0.00801 ; 0.13]	0.00596 **	0.003 **	21.3
Scale density	spot$	120 obs	6 groups	Rspot = 0.644	[0.2 ; 0.832]	< 0.001 ***	0.001 ***	30.1
Scale length
Bifid piliform scale	spot$	246 obs	5 groups	Rspot = 0.213	[0.0177 ; 0.458]	<0.001 ***	0.001 ***	12.1
Monofid piliform scale	spot$	354 obs	6 groups	Rspot = 0.248	[0.0462 ; 0.488]	<0.001 ***	0.001 ***	20
Scale width
Bifid piliform scale	spot$	246 obs	5 groups	Rspot = 0.346	[0.0391 ; 0.622]	< 0.001 ***	0.001 ***	10.2
Monofid piliform scale	spot$	354 obs	6 groups	Rspot = 0.537	[0.159 ; 0.756]	< 0.001 ***	0.001 ***	12.2

## Sheet: Supplementary File 1h
Dependant variable	Spot considered	factor	Observed mean contrast	p-value
chromatic contrast dS	s1	conspecific	2.25	< 0.001 ***
	s2	conspecific	2.89	< 0.001 ***
	s3	conspecific	1.74	< 0.001 ***
	s4	conspecific	1.75	< 0.001 ***
	s5	conspecific	1.66	< 0.001 ***
achromatic contrast dL	s1	conspecific	3.28	< 0.001 ***
	s2	conspecific	3.42	< 0.001 ***
	s3	conspecific	1.95	< 0.001 ***
	s4	conspecific	1.81	< 0.001 ***
	s5	conspecific	1.62	< 0.001 ***
