# Supplementary material for: Mimicry can drive convergence in structural and light transmission features of transparent wings in Lepidoptera
Source: eLife. 2021 Dec 21;10:e69080. doi: 10.7554/eLife.69080 (PMC8691843; doi:10.7554/eLife.69080)
Supplement: Supplementary file 2. — (a) Information on specimens used to infer a phylogeny. (b) Node constraints used to calibrate the phylogeny. For all constraints, we used uniform distribution priors whose bound were determined according to 95 % HSPD inferred by Kawahara et al., 2019 on their phylogeny of Lepidoptera. (c) Results of the best partition (based on BIC) for the eight different genes obtained with Partition Finder v1.0.1, with linked branch length and greedy algorithm. For each gene, pos1, pos2 and pos3 refer to codon positions. Only the substitution models available in BEAST were tested. GTR: general time reversible (base frequencies are variable, substitution matrix is symmetrical), HKY: Hasegawa-Kishino-Yano (base frequencies are variable, there are one transition rate and one tranversion rate), TrN: Tamura-Nei (base frequencies are variable, transversion rates are equal, transition rates are variable), I: proportion of invariable sites, G: gamma distribution (rate variation among sites is gamma distributed). [file elife-69080-supp2.xlsx]

## Sheet: Supplementary File 2a
Family	Subfamily	Tribe	Genus	species	ssp	mimicry ring	Tip label in MCCtree	Specimen ID for DNA	Collection location	Year of collection	CAD	COI	MDH	EF-1a	GAPDH	IDH	RpSR5	TKT
Bombycidae	Bombycinae		Bombyx	mori			Bombyx_mori	additional species	NA	NA	EU141315	AB649195	EU141617	EU136667	EU141495	EU141552	EU141393	NA
Cyclotornidae			Cyclotorna	sp.			Cyclotorna_sp	additional species	NA	NA	GU828262	GU929758	GU830488	GU829094	GU829868	GU830169	GU830747	NA
Drepanidae	Drepaninae		Drepana	curvatula			Drepana_curvulata	additional species	NA	NA	GU828107	KX050080	GU830317	AY948512	GU829758	GU829994	GU830616	NA
Epicopeiidae			Epicopeia	hainesii			Epicopeia_hainesii	additional species	NA	NA	GU828052	GU828343	GU830264	FJ768755	NA	GU829932	GU830574	NA
Erebidae	Arctiinae	Arctiini	Calodesma	albiapex			Calodesma_albiapex	additional species	NA	NA	KX300479	KX300241	KX300715	KX300361	KX300554	KX300636	KX300820	NA
Erebidae	Arctiinae	Arctiini	Dysschema	leucophaea			Dysschema_leucophaea	additional species	NA	NA	NA	HQ006240	HQ006658	HQ006427	HQ006493	HQ006571	HQ006751	NA
Erebidae	Arctiinae	Arctiini	Dysschema	sp.		confusa	ME15_88_DYSSSP1	ME15-88	Peru, San Martin, Carachamera	2015	pending	OL893209	OL743252	NA	NA	NA	NA	NA
Erebidae	Arctiinae	Arctiini	Episcea	extravagans			Episcea_extravagans	additional species	NA	NA	KX300482	KX300254	KX300717	KX300374	KX300555	KX300638	KX300823	NA
Erebidae	Arctiinae	Arctiini	Euchlaenidia	transcisa			Euchlaenidia_transcisa	additional species	NA	NA	KX300483	KX300258	KX300718	KX300378	KX300556	NA	KX300824	NA
Erebidae	Arctiinae	Arctiini	Hyalurga	egeon		lerida	ME16_67_HYALEGE	ME16-67	Peru, San Martin, Chazuta	2016	pending	pending	OL743257	NA	NA	NA	NA	NA
Erebidae	Arctiinae	Arctiini	Hyalurga	fenestrata			Hyalurga_fenestrata	additional species	NA	NA	KX300481	KX300273	KX300716	KX300390	NA	KX300637	KX300822	NA
Erebidae	Arctiinae	Arctiini	Hyalurga	grandis		agnosia	TR17_17_HYALGRA	TR17-17	Peru, San Martin, Shapaja	2015	pending	OL893232	NA	NA	NA	NA	NA	NA
Erebidae	Arctiinae	Arctiini	Hypocrita	confluens			Hypocrita_confluens	additional species	NA	NA	KX300478	KX300276	KX300713	KX300393	NA	KX300635	KX300818	NA
Erebidae	Arctiinae	Arctiini	Hypocrita	strigifera		blue	ME16_58_HYPOSTRI	ME16-58	Peru, San Martin, Chazuta	2016	NA	OL893217	OL743274	NA	NA	NA	NA	NA
Erebidae	Arctiinae	Arctiini	Hypocrita	strigifera			ME16_44_HYPOSTR	ME16-44 (additional species)	Peru, Lorerto, PB-mk7.1	2016	pending	OL893214	OL743272	NA	NA	NA	NA	NA
Erebidae	Arctiinae	Arctiini	Hypocrita	strigifera			ME16_64_HYPOSTR	ME16-64 (additional species)	Peru, San Martin, Urahuasha	2016	pending	OL893220	NA	NA	NA	NA	NA	NA
Erebidae	Arctiinae	Arctiini	Notophyson	tiresias		confusa	ME16_63_NOTOTIR	ME16-63	Peru, San Martin, Urahuasha	2016	pending	OL893219	OL743256	NA	NA	NA	NA	NA
Erebidae	Arctiinae	Arctiini	Notophyson	tiresias			TR17_9_NOTOTIRE	TR17-9 (additional species)			NA	OL893238	NA	NA	NA	NA	NA	NA
Erebidae	Arctiinae	Arctiini	Notophyson	tiresias			TR17_8_NOTOTIR	TR17-8 (additional species)	Peru, Loreto, Shucushyacu		pending	OL893237	OL743262	NA	NA	NA	NA	NA
Erebidae	Arctiinae	Arctiini	Notophyson	tiresias			TR17_4_NOTOTIRE	TR17-4 (additional species)	Ecuador		NA	OL893241	OL743260	NA	NA	NA	NA	NA
Erebidae	Arctiinae	Arctiini	Pseudophaloe	troetschi			Pseudophaloe_troetschi	additional species	NA	NA	GU828046	GU828336	GU830258	GU828880	NA	GU829925	GU830569	NA
Erebidae	Arctiinae	Arctiini	Sthenognatha	gentilis			Sthenognatha_gentilis	additional species	NA	NA	KX300480	KX300329	NA	KX300446	NA	NA	KX300821	NA
Erebidae	Arctiinae	Ctenuchini	Metastatia	pyrrhorhoea			Metastatia_pyrrhorhoea	additional species	NA	NA	NA	JQ524029	NA	NA	NA	NA	NA	NA
Erebidae	Arctiinae	Ctenuchini ?					ME16_16_METASP2	ME16-16 (additional species)	Peru, San Martin, Chazuta	2016	pending	OL893213	OL743254	NA	NA	NA	NA	NA
Erebidae	Arctiinae	Ctenuchini ?					TR17_13_CHTEN2	TR17-13 (additional species)	Peru, San Martin, Chazuta	2015	NA	OL893228	NA	NA	NA	NA	NA	NA
Erebidae	Arctiinae	Ctenuchini ?					11_996_CHTEN1	11-996 (additional species)	Peru, San Martin, Jepelacio	2011 ?	pending	OL893204	OL743250	NA	NA	NA	NA	NA
Erebidae	Arctiinae			Arctiinae1		eurimedia	TR17_7_MOTH1	TR17-7	Peru, Loreto, Shucushyacu	2015	pending	OL893236	OL743261	NA	NA	NA	NA	NA
Erebidae	Arctiinae			Arctiinae2		lerida	11_1065_MOTH2	11-1065	Peru, San Martin, Tarapoto	2011 ?	NA	OL893199	OL743246	NA	NA	NA	NA	NA
Erebidae	Arctiinae			Arctiinae3		blue	ME16_15_METASP1	ME16-15	Peru, San Martin, Chazuta	2016	NA	OL893212	OL743244	NA	NA	NA	NA	NA
Erebidae							ME16_91_MOTH3	ME16-91 (additional species)	Peru, San Martin, Rumiyacu	2016	pending	OL893222	NA	NA	NA	NA	NA	NA
Geometridae	Alsophilinae		Inurois	fumosa			Inurois_fumosa	additional species	NA	NA	NA	AB980825	NA	AB553238	NA	NA	NA	AB553145
Geometridae	Ennominae		Biston	panterinaria			Biston_panterinaria	additional species	NA	NA	KX950066	KP239036	NA	KP239754	KU355232	NA	KX950339	NA
Geometridae	Ennominae		Plutodes	costatus			Plutodes_costatus	additional species	NA	NA	JF785267	JF784784	JF784906	JF785402	JF785458	JF785538	JF785016	NA
Geometridae	Ennominae			Geo1		agnosia	11_1002_GEO1	11-1002	Peru, San Martin, Jepelacio	2011 ?	pending	OL893197	OL743271	NA	NA	NA	NA	NA
Geometridae	Ennominae			Geo2		agnosia	ME16_100_GE02	ME16-100	Peru, San Martin, Rumiyacu	2016	NA	OL893210	OL743277	NA	NA	NA	NA	NA
Geometridae	Larentiinae		Hagnagora	mortipax		agnosia	Hagnagora_mortipax	TR17-10	Ecuador, Qda del diablo	2011 ?	JF785169	JF784682	JF784825	JF785307	NA	NA	NA	NA
Geometridae	Larentiinae		Operophtera	brumata			Operophtera_brumata	additional species	NA	NA	KX343869	JQ616454	KX343791	JF785366	KX343449	KX343384	KX343322	NA
Geometridae	Larentiinae ?			Geo9		agnosia	TR17_16_GEO9	TR17-16	NA	2006	NA	OL893231	OL743280	NA	NA	NA	NA	NA
Geometridae				Geo12		eurimedia	ME16_105_GEO1	ME16-105	Peru, San Martin, Carachamera	2016	pending	OL893211	OL743253	NA	NA	NA	NA	NA
Geometridae				Geo3		agnosia	11_1879_GEO3	11-1879	Peru, San Martin, Tarapoto	2011	NA	OL893202	OL743264	NA	NA	NA	NA	NA
Geometridae							ME16_87_GEO1	ME16-87 (additional species)	Peru, San Martin, Rumiyacu	2016	NA	OL893221	OL743275	NA	NA	NA	NA	NA
Geometridae							11_1001_GEO2	11-1001 (additional species)	Peru, San Martin, Jepelacio	2011 ?	NA	OL893196	OL743263	NA	NA	NA	NA	NA
Lasiocampidae	Macromphaliinae		Tolype	velleda			Tolype_velleda	additional species	NA	NA	GU828060	GU828351	NA	GU828894	GU829729	GU829940	GU830580	NA
Notodontidae	Phalerinae		Phalera	bucephala			Phalera_bucephala	additional species	NA	NA	GU828108	JF415410	GU830358	GU829235	NA	GU829995	GU830651	NA
Notodontidae				Noto1		agnosia	ME16_92_GEO4	ME16-92	Peru, San Martin, Rumipata	2016	NA	OL893223	OL743268	NA	NA	NA	NA	NA
Notodontidae				Noto2		agnosia	TR17_1_GEO11	TR17-1	Peru, San Martin, Tunel	2012	NA	OL893239	OL743259	NA	NA	NA	NA	NA
Notodontidae							11_994_GEO5	11-994 (additional species)	Peru, San Martin, Jepelacio	2011 ?	pending	OL893203	OL743249	NA	NA	NA	NA	NA
Notodontidae							11_1064_GEO6	11-1064 (additional species)	Peru	2011	NA	OL893198	NA	NA	NA	NA	NA	NA
Notodontidae							TR17_15_GEO4	TR17-15 (additional species)	Peru, San Martin, Tarapoto	2015	NA	OL893230	OL743281	NA	NA	NA	NA	NA
Nymphalidae	Biblidinae	Biblidini	Vila	azeca		lerida	LS11_2414_ERES1	LS11-2414	Peru, San Martin, Shapaja-Chazuta	2011	pending	OL893207	OL743270	NA	NA	NA	NA	NA
Nymphalidae	Biblidinae	Biblidini	Vila	emilia		lerida	ME16_56_ERESCLI	ME16-56	Peru, San Martin, Chazuta	2016	pending	OL893216	OL743279	NA	NA	NA	NA	NA
Nymphalidae	Danainae	Danaini	Lycorea	ilione		confusa	Lycorea_ilione	LS11-1860	Peru, San Martin, Puente Serranoyacu	2011	pending	GQ864780	OL743266	GQ864874	NA	NA	NA	NA
Nymphalidae	Danainae	Ithomiini	Callithomia	lenea	zelie	confusa	Callithomia_lenea_zelie	NA	NA	NA	MG210038	EU068959	MG209883	EU069127	MG210246	NA	NA	KY749989
Nymphalidae	Danainae	Ithomiini	Godyris	hewitsoni		hewitsoni	Godyris_hewitsoni	NA	NA	NA	NA	JX573764	NA	JX573693	NA	NA	NA	KX362244
Nymphalidae	Danainae	Ithomiini	Godyris	panthyale	panthyale	panthyale	Godyris_panthyale_panthyale	NA	NA	NA	NA	JX573765	NA	JX573694	NA	NA	NA	KX362248
Nymphalidae	Danainae	Ithomiini	Heterosais	nephele		agnosia	Heterosais_nephele_nephele	NA	NA	NA	NA	EU068984	NA	EU069149	NA	NA	NA	KX362212
Nymphalidae	Danainae	Ithomiini	Hyalenna	paradoxa	praestigiosa	panthyale	Hyalenna_paradoxa_praestigiosa	NA	NA	NA	MG210029	JX573781	MG209896	JX573710	MG210228	NA	NA	MG209923
Nymphalidae	Danainae	Ithomiini	Hypomenitis	enigma	pseudortygia	panthyale	Hypomenitis_enigma	NA	NA	NA	MH892965	JX573770	MH893225	JX573699	MH893140	NA	NA	KX362153
Nymphalidae	Danainae	Ithomiini	Hypomenitis	lydia		hewitsoni	Hypomenitis_lydia	NA	NA	NA	NA	JX573776	NA	KX361962	NA	NA	NA	KX362167
Nymphalidae	Danainae	Ithomiini	Hypomenitis	oneidodes		theudelinda	Hypomenitis_oneidodes	NA	NA	NA	NA	JX573777	NA	JX573706	NA	NA	NA	KX362169
Nymphalidae	Danainae	Ithomiini	Hypomenitis	ortygia	ortygia	panthyale	Hypomenitis_ortygia_ortygia	NA	NA	NA	MH892962	JX573778	MH893220	JX573707	MH893142	NA	NA	KX362172
Nymphalidae	Danainae	Ithomiini	Hypomenitis	theudelinda	zalmunna	theudelinda	Hypomenitis_theudilinda_zalmunna	NA	NA	NA	NA	JX573779	NA	JX573708	NA	NA	NA	KX362175
Nymphalidae	Danainae	Ithomiini	Ithomia	agnosia	agnosia	agnosia	Ithomia_agnosia_agnosia	NA	NA	NA	MH892916	EU068990	MH893193	EU069182	NA	NA	NA	FJ468996
Nymphalidae	Danainae	Ithomiini	Ithomia	amarilla		eurimedia	Ithomia_amarilla	NA	NA	NA	MH892917	EU069067	MH893194	EU069184	MH893149	NA	NA	AY704063
Nymphalidae	Danainae	Ithomiini	Ithomia	avella	epona	theudelinda	Ithomia_avella	NA	NA	NA	MH892918	JX573790	MH893195	AY704019	MH893150	NA	NA	NA
Nymphalidae	Danainae	Ithomiini	Mcclungia	cymo		eurimedia	Mcclungia_cymo	NA	NA	NA	MH892923	DQ157512	MH893197	DQ177957	MH893153	NA	NA	KX362176
Nymphalidae	Danainae	Ithomiini	Megoleria	orestilla	orestilla	banjana-m	Megoleria_orestilla	NA	NA	NA	MH892947	JX573793	MH893219	FN551046	NA	NA	NA	FN568148
Nymphalidae	Danainae	Ithomiini	Methona	curvifascia		confusa	Methona_curvifascia	NA	NA	NA	MH892926	EU069005	MH893231	EU069212	NA	NA	NA	MH893466
Nymphalidae	Danainae	Ithomiini	Napeogenes	harbona		banjana-m	Napeogenes_harbona	NA	NA	NA	NA	FJ468750	NA	FJ468888	NA	NA	NA	FJ469034
Nymphalidae	Danainae	Ithomiini	Napeogenes	inachia		eurimedia	Napeogenes_inachia	NA	NA	NA	MH892931	EU069007	MH893202	EU069221	NA	NA	NA	FJ469057
Nymphalidae	Danainae	Ithomiini	Napeogenes	larilla		theudelinda	Napeogenes_larilla	NA	NA	NA	NA	DQ069241	NA	DQ073033	NA	NA	NA	AY848727
Nymphalidae	Danainae	Ithomiini	Napeogenes	sylphis	corena	aureliana	Napeogenes_sylphis_corena	NA	NA	NA	NA	EU069091	NA	EU069230	NA	NA	NA	HM052215
Nymphalidae	Danainae	Ithomiini	Oleria	athalina	banjana	banjana-m	Oleria_athalina_banjana	NA	NA	NA	MH892948	FN651613	MH893227	FN551072	NA	NA	NA	FN568169
Nymphalidae	Danainae	Ithomiini	Oleria	onega		lerida	Oleria_onega	NA	NA	NA	MH892968	EU068970	MH893233	EU069243	MH893173	NA	NA	HM052264
Nymphalidae	Danainae	Ithomiini	Oleria	sexmaculata	sexmaculata	lerida	Oleria_sexmaculata_sexmaculata	NA	NA	NA	MH892954	EU069100	MH893206	FN551161	NA	NA	NA	FN568247
Nymphalidae	Danainae	Ithomiini	Ollantaya	olerioides		banjana-m	Oleria_olerioides	NA	NA	NA	MG210022	JX573805	NA	FN551054	NA	NA	NA	FN568156
Nymphalidae	Danainae	Ithomiini	Pseudoscada	florula	aureola	aureliana	Pseudoscada_florula_aureola	NA	NA	NA	NA	EU068971	NA	EU069247	NA	NA	NA	HM052164
Nymphalidae	Danainae	Ithomiini	Pseudoscada	timna	utilla	agnosia	Pseudoscada_timna_utilla	NA	NA	NA	NA	EU069015	NA	EU069249	NA	NA	NA	KX362181
Nymphalidae	Danainae	Ithomiini	Pteronymia	oneida	oneida	hewitsoni	Pteronymia_oneida_oneida	NA	NA	NA	NA	KY750077	NA	KY750158	NA	NA	NA	KY749925
Nymphalidae	Danainae	Ithomiini	Veladyris	pardalis		theudelinda	Veladyris_pardalis	NA	NA	NA	MG209995	JX573827	MG209855	DQ177993	MG210197	NA	NA	KX362141
Nymphalidae	Nymphalinae	Melitaeini	Eresia	nauplius	plagiata	lerida	Eresia_nauplius_plagiata	ME10-292	Ecuador, Napo, Mariposa	2010	NA	EF493944	OL743251	EF493994	NA	NA	NA	NA
Nymphalidae				Nymp1			ME16_46_NYMP1	ME16-46 (additional species)	Peru, Loreto, PB-mk7.1	2016	NA	OL893215	OL743255	NA	NA	NA	NA	NA
Papilionidae	Papilioninae	Papilionini	Papilio	glaucus			Papilio_glaucus	additional species	NA	NA	EU141334	EU141368	EU141635	EU136675	EU141512	EU141571	NA	NA
Papilionidae	Papilioninae	Troidini	Parides	hahneli		confusa	Parides_iphidamas	Parides iphidamas	NA	NA	JN204942	JQ602236	NA	JN204982	JN204990	JN205007	JN205035	JN204926
Pieridae	Dismorphiinae		Dismorphia	teresa			TR17_18_DISMSP1	TR17-18 (additional species)	Ecuador	2006	pending	OL893233	OL743245	NA	NA	NA	NA	NA
Pieridae	Dismorphiinae		Dismorphia	theucharila	leucone	lerida	TR17_14_DISMTHEU	TR17-14	Ecuador, Orellana, Anangu	2011 ?	pending	OL893229	OL743276	NA	NA	NA	NA	NA
Pieridae	Dismorphiinae		Dismorphia	theucharila	orange tip	aureliana	TR17_6_DISMTHEU	TR17-6	Ecuador, Orellana, Anangu	2005	NA	OL893235	OL743269	NA	NA	NA	NA	NA
Pieridae	Dismorphiinae		Dismorphia	theucharila	yolanda	banjana-m	LS11_2240_DISTH	LS11-2240	Peru, San Martin, La Antena	2011	pending	OL893206	OL743267	NA	NA	NA	NA	NA
Pieridae	Dismorphiinae		Dismorphia	zathoe			Dismorphia_zathoe	additional species	NA	NA	KM046512	AY954566	NA	AY870578	KM046859	NA	KM046618	NA
Pieridae	Dismorphiinae		Moschoneura	pinthous		eurimedia	TR17_3_MOSCPINT	TR17-3	Peru, San Martin, tunel	NA	pending	OL893240	OL743243	NA	NA	NA	NA	NA
Pieridae	Dismorphiinae		Moschoneura	pinthous			Moschoneura_pinthous_GB	additional species	NA	NA	KM046539	KM046823	KM046711	AY870575	KM046887	KM046773	NA	NA
Pieridae	Dismorphiinae		Patia	orise		confusa	Patia_orise	NA	NA	NA	KM046544	KM046826	NA	AY870577	KM046893	KM046778	NA	NA
Pieridae	Pierinae	Pierini	Itaballia	demophile			Itaballia_demophile	additional species	NA	NA	KM046528	KM046816	KM046702	AY870584	KM046875	KM046764	NA	NA
Pieridae	Pierinae	Pierini	Itaballia	pandosia		eurimedia	ME16_62_ITAPAND	ME16-62	Peru, San Martin, Urahuasha	2016	NA	OL893218	OL743273	NA	NA	NA	NA	NA
Pieridae	Pierinae	Pierini	Itaballia	pandosia			Itaballia_pandosia	additional species	NA	NA	NA	KP849016	NA	NA	NA	NA	NA	NA
Pieridae	Pierinae		Perrhybris ?	Pier1		eurimedia	MECN_140_PIER1	MECN-140	Ecuador, Napo	2011 ?	pending	pending	OL743258	NA	NA	NA	NA	NA
Pyralidae	Pyralinae		Pyralis	farinalis			Pyralis_farinalis	additional species	NA	NA	NA	KX043023	GU830302	GU828925	GU829747	GU829979	GU830604	NA
Riodinidae	Riodininae	Eurybiini	Ithomiola	callixena			Ithomiola_callixena	additional species	NA	NA	KT286319	KT286488	NA	KT286188	NA	NA	NA	NA
Riodinidae	Riodininae	Eurybiini	Ithomiola	floralis	orange tip	aureliana	11-1116_ITHOFLO	11-1116	Peru, San Martin, Tarapoto	2011 ?	NA	OL893200	OL743247	NA	NA	NA	NA	NA
Riodinidae	Riodininae	Eurybiini	Ithomiola	floralis	white-band	agnosia	11_1127_ITHOFLO	11-1127	Peru, San Martin, La Antena	2011 ?	pending	OL893201	OL743248	NA	NA	NA	NA	NA
Riodinidae	Riodininae	Nymphidiini	Stalachtis	euterpe		aureliana	TR17_5_STALEUT	TR17-5	Peru, Loreto, Shucushyacu	2015	pending	OL893234	OL743265	NA	NA	NA	NA	NA
Riodinidae	Riodininae	Nymphidiini	Stalachtis	euterpe			Stalachtis_euterpe_GB	additional species	NA	NA	NA	KT286550	NA	KT286243	MG607738	NA	MG608163	NA
Riodinidae	Riodininae			Riodin2		agnosia	TR17_12_GEO7	TR17-12	Peru, San Martin, Tarapoto	2015	NA	OL893227	NA	NA	NA	NA	NA	NA
Riodinidae				Riodin1		banjana-m	MECN_133_BUT1	MECN-133	Ecuador, Napo	2011	NA	OL893224	NA	NA	NA	NA	NA	NA
Riodinidae				Riodin3		agnosia	TR17_11_GEO8	TR17-11	Peru, San Martin, Rumipata	2016	NA	OL893226	OL743278	NA	NA	NA	NA	NA
Saturniidae	Agliinae		Aglia	tau			Aglia_tau	additional species	NA	NA	GU828131	GU828430	GU830340	EF654540	GU829770	GU830019	GU830636	NA

## Sheet: Supplementary File 2b
Nodes constrained (crown age)	Mean node age (in million year)	Upper bound	Lower bound
Bombicoidae + Lasiocampoidae	84.05	74.15	94.4
(Bombicoidae + Lasiocampoidae) + Geometroidae	88.66	78.61	99.27
((Bombicoidae + Lasiocampoidae) + Geometroidae) + Noctuoidae	91.15	80.92	101.97
(((Bombicoidae + Lasiocampoidae) + Geometroidae) + Noctuoidae) + Drepanoidae	93.73	83.27	104.79
((((Bombicoidae + Lasiocampoidae) + Geometroidae) + Noctuoidae) + Drepanoidae) + Pyraloidae = InMoth	101.33	90.18	113.05
InMoth_Papilionoidae = Ingroup	107.64	95.97	119.94
ingroup_Zygaenoidae	111	98.99	123.66
Erebidae + Notodontidae = Noctuoidae	77.6	66.97	88.57
Riodinidae + Nymphalidae	78.64	68.19	89.59
(Riodinidae + Nymphalidae) + Pieridae	84.91	74.18	96.29
((Riodinidae + Nymphalidae) + Pieridae) + Papilionidae = Papilionoidae	98.34	86.85	110.33

## Sheet: Supplementary File 2c
Gene fragment and codon position	Best substitution model
CAD_pos1, IDH_pos1, MDH_pos1, TKT_pos1	GTR+I+G
CAD_pos2, MDH_pos2, TKT_pos2	GTR+I+G
CAD_pos3, MDH_pos3	HKY+I+G
COI_pos1	GTR+I+G
COI_pos2	HKY+I+G
COI_pos3	HKY+G
EF-1a_pos1, GAPDH_pos1, RpS5_pos1	TrN+I+G
EF-1a_pos2, GAPDH_pos2, IDH_pos2, RpS5_pos2	HKY+I+G
EF-1a_pos3	GTR+I+G
GAPDH_pos3, IDH_pos3, RpS5_pos3	GTR+I+G
TKT_pos3	HKY+G
