# Supplementary material for: Mimicry can drive convergence in structural and light transmission features of transparent wings in Lepidoptera
Source: eLife. 2021 Dec 21;10:e69080. doi: 10.7554/eLife.69080 (PMC8691843; doi:10.7554/eLife.69080)
Supplement: Supplementary file 3. — (a) Results of the linear mixed model linking mean transmittance over 300–700 nm (physical descriptor of transparency) and coordinates in tetrahedral colour space (x, y, z) and luminance extracted from the vision model with UVS visual system and large gap ambient light (biologically relevant descriptors of transparency). For each species, the five measurements were used, and the specimen was taken as random effect, and all the variables were centred and scaled. (b) Analysis of deviance table to check the importance of the effect of each variable on mean transmittance over 300–700 nm. (c) Results of the PGLS model (F4,57 = 3728 (p-value < 0.001 ***), AICc = –159.4, Radj2 = 0.9959, λ = 0 (probability(λ=1) < 0.001)) linking average mean transmittance over 300–700 nm (physical descriptor of transparency) with average coordinates in tetrahedral space (x, y and z) and luminance extracted from vision models (biologically relevant descriptors of transparency). (d) Results of the phylogenetic ANOVA on nanostructure density with nanostructure type as factor. The p-value is based on simulations. (e) Results of the post-hoc tests (t values) to determine which type of nanostructures is different in density to others. p-values were corrected with Bonferroni correction and are indicated in brackets after t-values. Significant differences between nanostructure types are highlighted in bold. (f) Results of the type III analysis of variance on the model linking scale density with species and side (ventral or dorsal) to determine the effect of each variable on scale density. (g) Results of the type III analysis of variance on the model linking scale length with species, side (ventral or dorsal) and scale type (lamellar, piliform bifid or piliform monofid) to determine the effect of each variable on scale length. (h) Results of the type III analysis of variance on the model linking scale width with species, side (ventral or dorsal) and scale type (lamellar, piliform bifid or piliform m [file elife-69080-supp3.xlsx]

## Sheet: Supplementary file 3a
	Value	Standard error	Degree of freedom	t-value	p-value
(Intercept)	0	0.0076	244	0	1
x	0.0588	0.0128	244	4.62	< 0.001 ***
y	0.031	0.00917	244	3.39	< 0.001 ***
z	0.0901	0.0128	244	7.04	< 0.001 ***
Luminance	1.01	0.00528	244	191	< 0.001 ***

## Sheet: Supplementary file 3b
	χ²	Degree of freedom	Pr ( > χ²)
x	21.6	1	< 0.001 ***
y	11.7	1	< 0.001 ***
z	50.4	1	< 0.001 ***
Luminance	37073	1	< 0.001 ***

## Sheet: Supplementary file 3c
	Value	Standard error	t-value	Pr(>|t|)
(Intercept)	-8.64e-09	8.11*10-3	0	1
x	0.0257	0.0303	0.85	0.399
y	0.00178	0.0218	0.0816	0.935
z	0.0674	0.0294	2.29	0.0256 *
Luminance	1	0.0104	96	< 0.001 ***

## Sheet: Supplementary file 3d
	Sum of square	Mean square	F value	Pr (> F)
Nanostructure type	2341	585.3	26.27	0.001
Residual	1270	22.29

## Sheet: Supplementary file 3e
	Absence of nanostructures	Maze	Nipples	Sponge	pillar
Absence of nanostructures	0 (p =1)
Maze	1.419 (p = 1)	0 (p =1)
Nipples	2.977 (p = 0.10)	0.219 (p = 1)	0 (p =1)
Sponge	5.206 (p = 0.03)	2.167 (p = 0.57)	3.802 (p = 0.85)	0 (p =1)
pillar	8.345 (p =0.01)	3.898 (p = 0.01)	8.589 (p = 0.01)	2.608 (p = 0.01)	0 (p =1)

## Sheet: Supplementary file 3f
Variable	Sum of squares	Degree of freedom	F-value	p-value
Intercept	212930	1	91.2	< 0.001 ***
Species	283155	10	12.1	< 0.001 ***
Scale type	73	1	0.031	0.864
Wing side	87	1	0.037	0.851
Interaction between side and scale type	1289	1	0.55	0.479
Residuals	18673	8

## Sheet: Supplementary file 3g
Variable	Sum of squares	Degree of freedom	F-value	p-value
Intercept	6729	1	28.5	< 0.001 ***
Species	8179	10	3.46	0.006 **
Scale type	18299	2	38.8	< 0.001 ***
Wing side	59	1	0.25	0.62
Interaction between side and scale type	174	2	0.37	0.695
Residuals	5665	24

## Sheet: Supplementary file 3h
Variable	Sum of squares	Degree of freedom	F-value	p-value
Intercept	2572	1	464	< 0.001 ***
Species	93	10	1.68	0.143
Scale type	1802	2	162	< 0.001 ***
Wing side	17	1	3.08	0.092
Interaction between side and scale type	13	2	1.17	0.326
Residuals	133	24
